# Supplementary material for: Decreased mTOR signalling reduces mitochondrial ROS in brain via accumulation of the telomerase protein TERT within mitochondria
Source: PubMed Central journal article supplement (PMC5115906; doi:10.18632/aging.101089), 2016-10-22
Supplement: aging-08-2551-s001.pdf [file aging-08-2551-s001.pdf]

## SUPPLEMENTARY MATERIAL

A

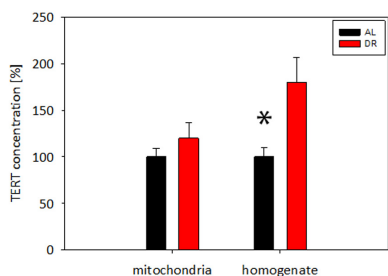

B

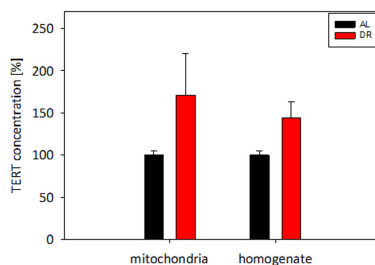

C

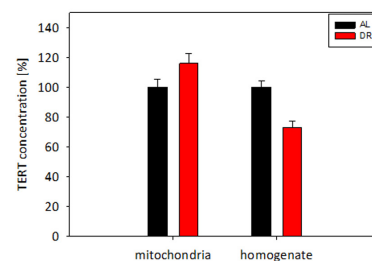

D

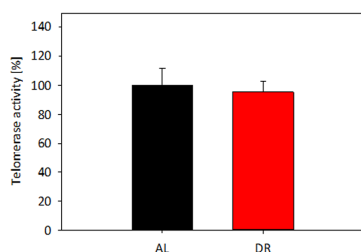

E

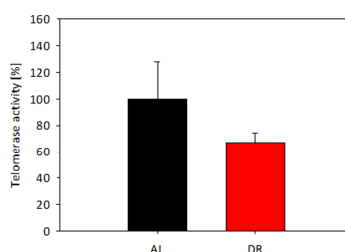

F

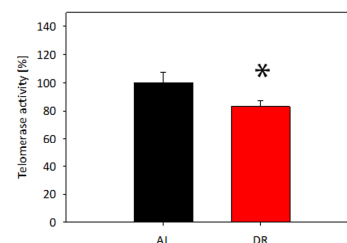

**Supplementary Figure S1. TERT protein abundance and telomerase activity in mouse liver fractions of 3 short term DR experiments.** (A-C) TERT protein abundance in liver mitochondria and homogenates from the same mice as used for figure 3 D-F (percentage of *ad libitum*-fed controls). (D-F) telomerase activity (TA, measured by TRAP assay as percentage of *ad-libitum*-fed controls) in liver homogenates in the same DR experiments as above. (A, D) Experiment 1; 4 animals per group. (B, E) Experiment 2, n=4 per group. (C, F) Experiment 3, n=7 per group for mitochondria and n=3 per group for homogenates. \*Statistical significance was tested by t- test. \* p<0.05.

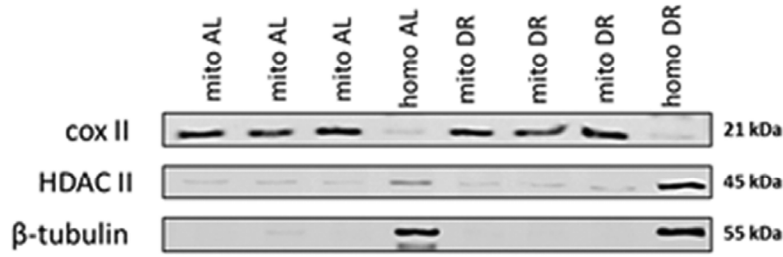

**Supplementary Figure S2. Purity of the brain mitochondrial fraction.** Isolated mitochondria and tissue homogenates were subjected to Western blotting with antibodies localized to mitochondria (Cox II, cytochrome c oxidase II), the nucleus (HDAC II, histone deacetylase II) and the cytoplasm ( $\beta$ -tubulin). Mito: mitochondrial fraction; homo: whole brain homogenate.

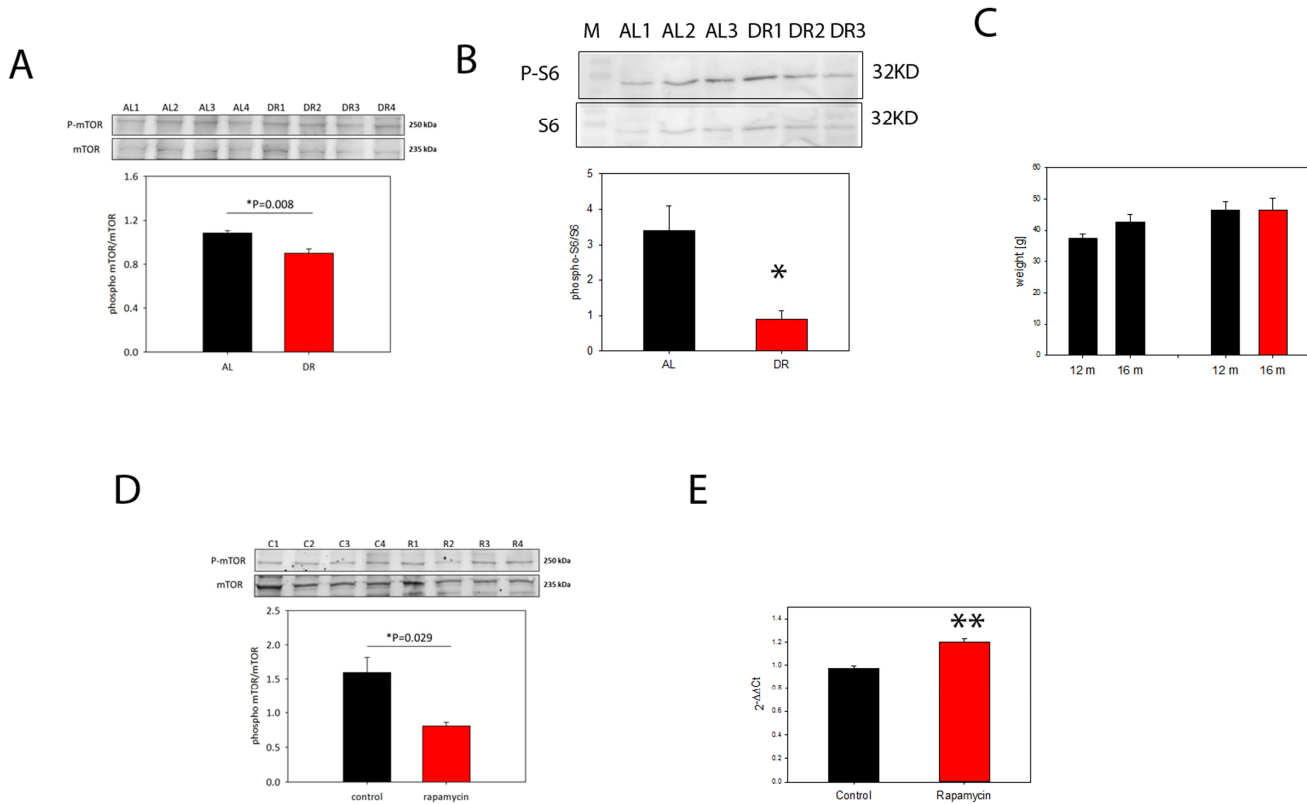

**Supplementary Figure S3. Downregulation of the mTOR pathway in mouse brain after rapamycin treatment and short term DR.** (A) mTOR phosphorylation after short term dietary restriction in mouse brain tissue after short term DR (exp. 1). Upper panels: immuno-blot with indicated antibodies, AL1-AL4 – *ad libitum* fed, DR1-DR4 – dietary restricted; lower panels: densitometric quantification, as the average of the ratios of phosphorylated to non-phosphorylated protein. \*  $p=0.008$ , t-test. (B) S6 phosphorylation in the same experiment as in A. \* $P<0.05$ , t-test. (C) Body weight (in g) of rapamycin-treated and control wild type mice at ages of 12 months (before rapamycin) and 16 months (after rapamycin). (D) mTOR phosphorylation in brain tissue after 4 months of rapamycin treatment, C1-C4 –controls R1-R4 –rapamycin. \*  $P<0.05$ , t-test (E) TERT mRNA abundance in mouse brain tissue after 4 months of rapamycin treatment measured by qPCR,  $n=3-4$  per group. \*\* $P<0.001$ , t-test.

## SUPPLEMENTARY METHODS

### Immunoblotting

Tissue homogenates and mitochondria were lysed using CHAPS buffer (Roche). 60µg protein per sample was run on 10% polyacrylamide gel and blotted to ECL membrane (GE Healthcare) at 100V for 90 min. at 4°C, blocked and incubated with the primary antibody diluted over night at 4°C, After washing with TBST buffer and incubation with a peroxidase labelled secondary antibody membranes were developed with t a chemiluminescence detection kit (GE Healthcare) images were taken with a LAS 3000<sup>®</sup> camera (Fujifilm) and quantified by densitometry and normalised to the loading control (β-tubulin) using AIDA<sup>®</sup> software (Raytest).

### TRAP assay

Telomerase was determined using the TeloTTAGGG telomere repeat assay (Roche) as described previously [7, 10] using 100ng liver tissue per reaction and a serial dilution of Hela cells (100, 10, 1, 0.1ng) as controls.

**Supplementary Table 1. Primary antibodies used for immunoblotting**

| antibody               | manufacturer    | dilution |
|------------------------|-----------------|----------|
| HDACII                 | Abcam           | 1:800    |
| CoxII                  | Santa Cruz      | 1:200    |
| phospho-mTOR (Ser2448) | Abcam           | 1:500    |
| mTOR                   | Abcam           | 1:500    |
| phospho-S6             | Cell Signalling | 1:1000   |
| S6                     | Cell Signalling | 1:1000   |
| β-tubulin              | Abcam           | 1:1000   |
